# Supplementary material for: Full-text chemical identification with improved generalizability and tagging consistency
Source: Oxford University Press journal article supplement (doi:10.1093/database/baac074), 2022-01-01
Supplement: baac074_supp.zip [file baac074_supp.zip]

Archive with 1 entries (1 files):
- _Database__fulltext_chemical_identification.pdf
